# Supplementary material
Source: PubMed Central journal article supplement (PMC3288779)
Supplement: NIHMS341120-supplement-2.pdf [file NIHMS341120-supplement-2.pdf]

# Supplemental Figure 1A Sungmun Lee

## TPEN Treatment (30 $\mu$ M for 30 min) Did Not Induce Apoptosis Nor Toxicity

n = 3

Control

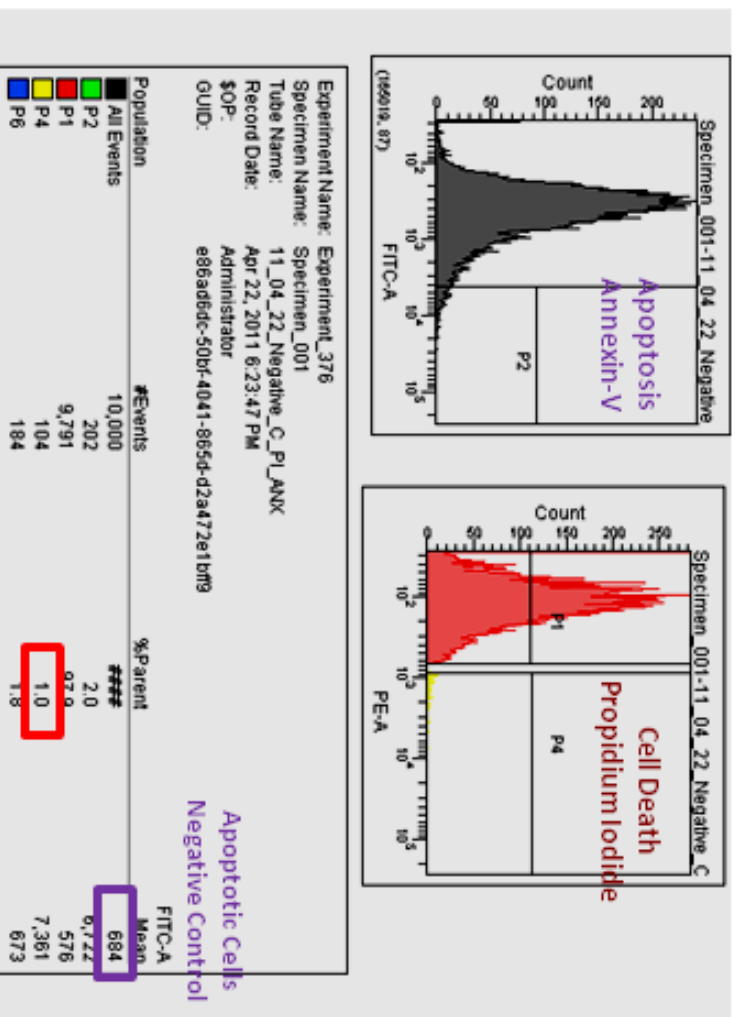

Dead Cell Population (%)  
 Negative Control

TPEN treatment

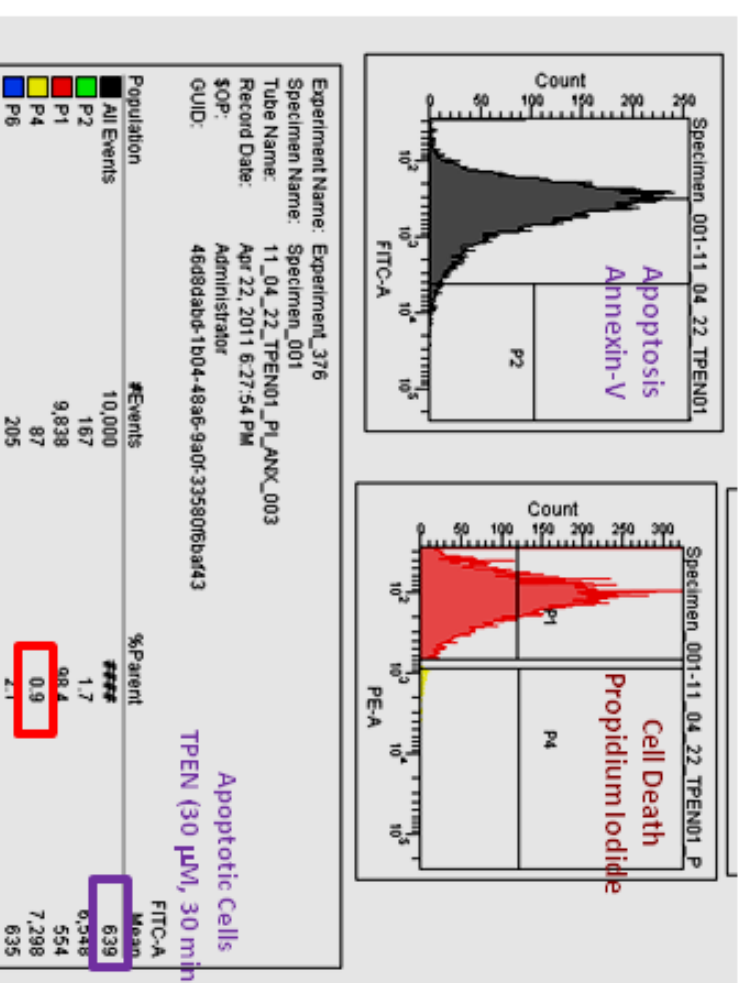

Dead Cell Population (%)  
 TPEN (30  $\mu$ M, 30 min)
