# Supplementary material
Source: PubMed Central journal article supplement (PMC3288779)

# Supplemental Figure 1B Sungmun Lee TPEN Treatment (30 $\mu$ M for 30 min) Did Not Induce Apoptosis Nor Toxicity

(n = 3)

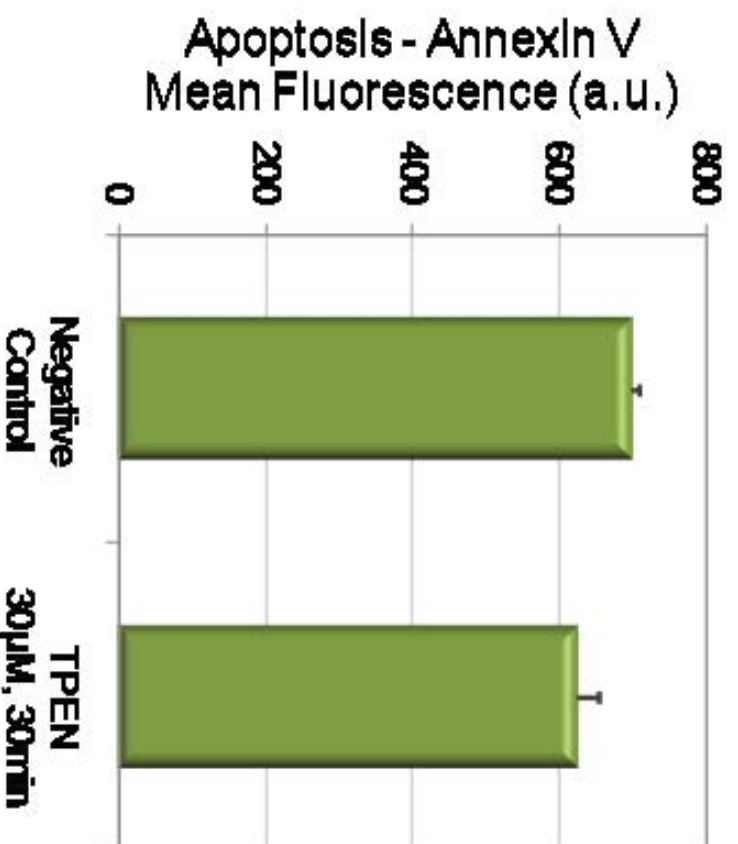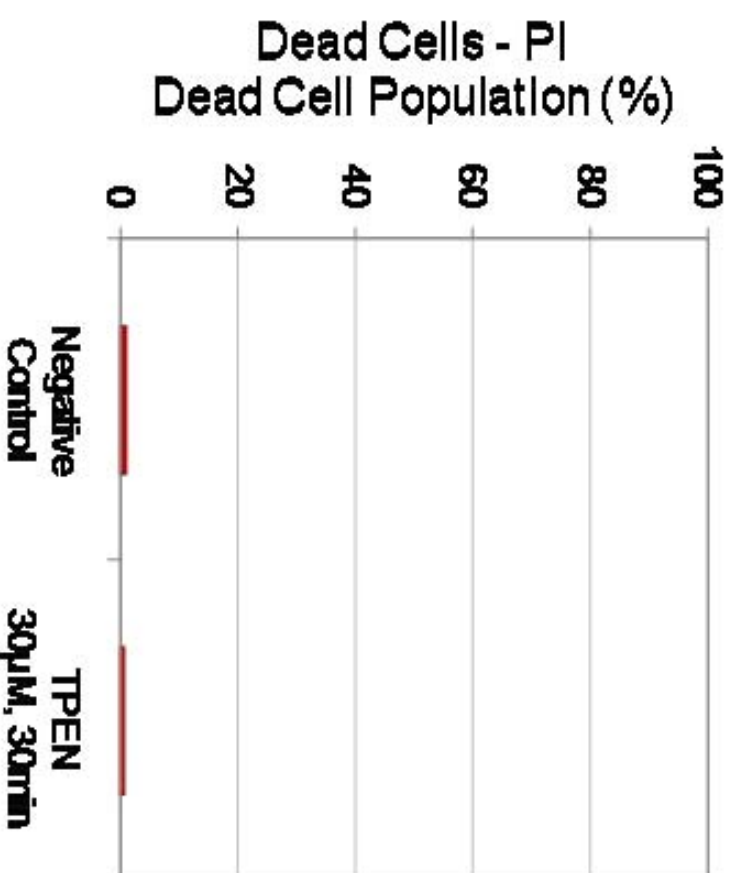

Supplement: NIHMS341120-supplement-3.pdf [file NIHMS341120-supplement-3.pdf]
